# Supplementary material for: α-Fe2O3 Nanoparticles/Vermiculite Clay Material: Structural, Optical and Photocatalytic Properties
Source: PubMed Central journal article supplement (PMC6600952; doi:10.3390/ma12111880), 2019-06-11
Supplement: materials-12-01880-s001.pdf [file materials-12-01880-s001.pdf]

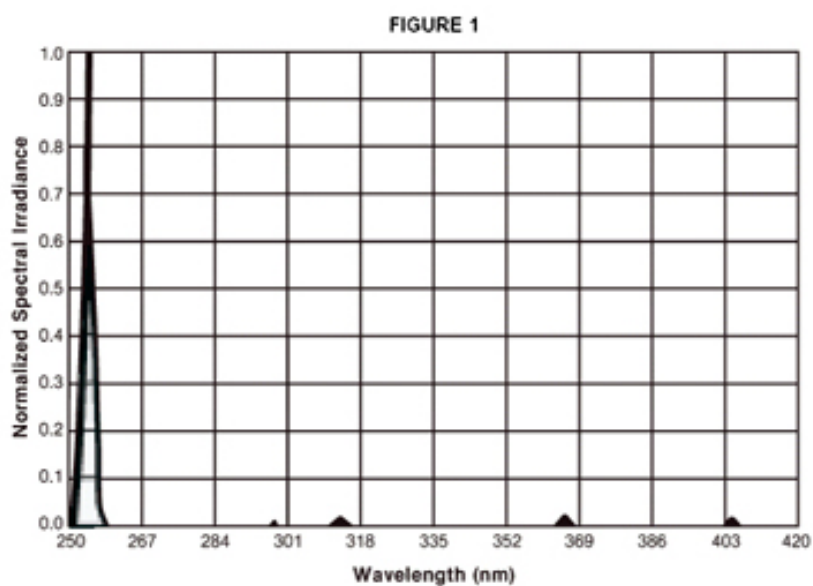

**Figure S1.** Spectrum of the Hg lamp.

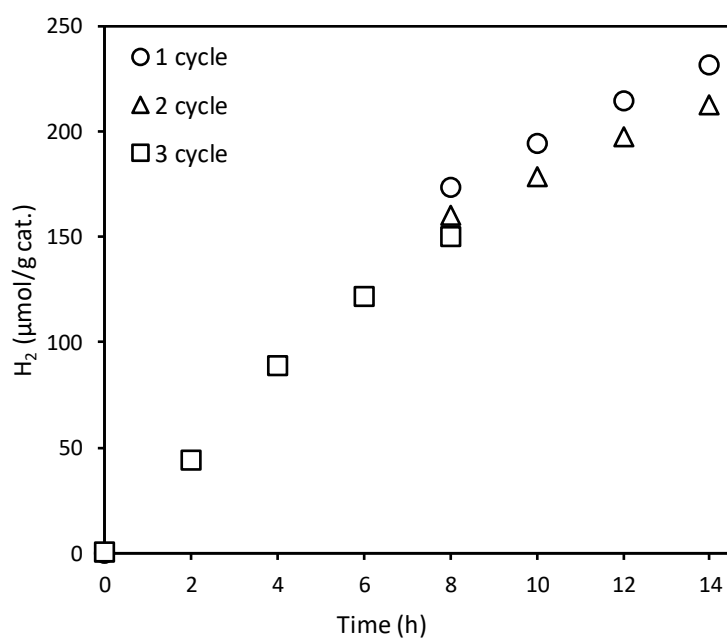

**Figure S2.** Production of hydrogen during the photocatalytic reduction of CO<sub>2</sub> in presence  $\alpha$ -Fe<sub>2</sub>O<sub>3</sub>\_500 in the three cycles.
